# Supplementary material
Source: Springer Nature journal article supplement (https://www.springermedizin.de/resource/supplementary/12887_2011_647_MOESM2_ESM.pdf/9475722)

# When to Use Hand Sanitizer

When Entering School  
in the Morning

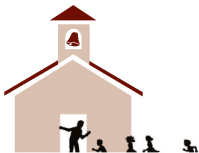

Before and After Lunch

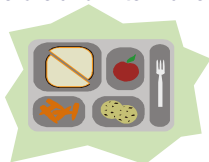

After Coughing or  
Sneezing

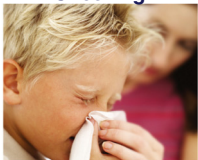

After Recess

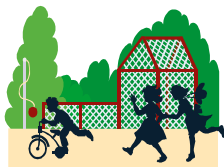

Before and After Eating  
in Class

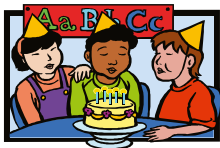

After Using the Gym

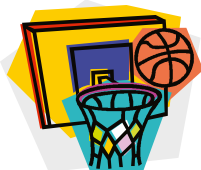

After a School Field Trip

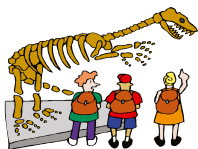

When Leaving School  
for the Day

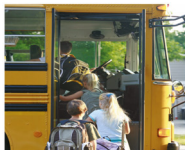

Supplement: MOESM2 [file 9475722]
